# Supplementary material
Source: PubMed Central journal article supplement (PMC7543291)
Supplement: ONCO-25-886-s001.pdf [file ONCO-25-886-s001.pdf]

Supplemental Table for:  
 HER2 overexpression as a poor prognostic determinant in resected biliary tract cancer  
 Caterina Vivaldi et al.

**Supplementary Table 1. Correlation between IHC and FISH results**

| IHC status | N  | FISH          |           |              |
|------------|----|---------------|-----------|--------------|
|            |    | Not amplified | Amplified | Not assessed |
| <b>0</b>   | 50 | -             | -         | 50           |
| <b>1</b>   | 17 | -             | -         | 17           |
| <b>2</b>   | 24 | 20            | 2         | 2            |
| <b>3</b>   | 9  | 1             | 5         | 3            |

**Abbreviations:** FISH, fluorescence in situ hybridization; IHC, immunohistochemistry; N, number (of patients).
